# Supplementary material
Source: PubMed Central journal article supplement (PMC7572306)
Supplement: mmc1.pdf [file mmc1.pdf]

## Supplementary references

- S1. De-Heer R, Doherty T. A Case of Hydroxychloroquine Induced Hypoglycaemia in a Non-Diabetic Patient. *J Rheum Dis Treat*. 2018;4:066. <https://doi.org/10.23937/2469-5726/1510066>
- S2. Sheikhbahaie F, Amini M, Gharipour M, et al. The effect of hydroxychloroquine on glucose control and insulin resistance in the prediabetes condition. *Adv Biomed Res*. 2016;5:145. <https://doi.org/10.4103%2F2277-9175.187401>
- S3. Smith GD, Amos TA, Mahler R, et al. Effect of chloroquine on insulin and glucose homeostasis in normal subjects and patients with non-insulin-dependent diabetes mellitus. *Br Med J (Clin Res Ed)*. 1987;294(6570):465-7. <https://doi.org/10.1136/bmj.294.6570.465>
- S4. Dai Y, Lin G, Shi D. Hypoglycemia Induced by Hydroxychloroquine Sulfate in a Patient Treated for Connective Tissue Disease Without Diabetes Mellitus. *Clin Ther*. 2020 May;42(5):940-945 <https://doi.org/10.1016/j.clinthera.2020.03.011>
- S5. El-Solia A, Al-Otaibi K, Ai-Hweish AK. Hydroxychloroquine-induced hypoglycemia in nondiabetic renal patient on peritoneal dialysis. *BMJ Case Rep*. 2018 Apr 18;2018. pii: bcr-2017-223639. <https://doi.org/10.1136/bcr-2017-223639>
- S6. Yao X, Ye F, Zhang M, et al. In Vitro Antiviral Activity and Projection of Optimized Dosing Design of Hydroxychloroquine for the Treatment of Severe Acute Respiratory Syndrome Coronavirus 2 (SARS-CoV-2). *Clin Infect Dis*. 2020 Mar 9. pii: ciaa237. <https://doi.org/10.1093%2Fcid%2Fciaa237>
- S7. Alberici F, Delbarba E, Manenti C, et al. Management of Patients on Dialysis and With Kidney Transplantation During the SARS-CoV-2 (COVID-19) Pandemic in Brescia, Italy. *Kidney Int Rep*. 2020 Apr;5(5):580-5. <https://doi.org/10.1016/j.ekir.2020.04.001>
- S8. Kapoor A, Pandurangi U, Arora V, et al. Cardiovascular risks of hydroxychloroquine in treatment and prophylaxis of COVID-19 patients: A scientific statement from the Indian Heart Rhythm Society. *Indian Pacing Electrophysiol J*. 2020 May-Jun;20(3):117–120. <https://doi.org/10.1016%2Fj.ipej.2020.04.003>
- S9. Mehra MR, Ruschitzka F, Patel AN. Retraction- Hydroxychloroquine or chloroquine with or without a macrolide for treatment of COVID-19: a multinational registry analysis. *The Lancet*. 2020 Jun 5. [https://doi.org/10.1016/S0140-6736\(20\)31324-6](https://doi.org/10.1016/S0140-6736(20)31324-6)
- S10. Mehra MR, Desai SS, Kuy SR, et al. Retraction: Cardiovascular Disease, Drug Therapy, and Mortality in Covid-19. *N Engl J Med*. 2020 Jun 4 <https://doi.org/10.1056/NEJMc2021225>.
